# Supplementary material for: Computing water flow through complex landscapes – Part 1: Incorporating depressions in flow routing using FlowFill
Source: Copernicus journal article supplement (doi:10.5194/esurf-7-737-2019), 2019-08-22
Supplement: Supplementary file 1 [file esurf-7-737-2019-supplement.zip]

Archive with 2 entries (2 files):
- esurf-7-737-2019-supplement-title-page.pdf
- Runoff_UnfilledCells_Depressions.xlsx
