# Supplementary material for: Computing water flow through complex landscapes – Part 1: Incorporating depressions in flow routing using FlowFill
Source: Copernicus journal article supplement (doi:10.5194/esurf-7-737-2019), 2019-08-22
Supplement: Supplementary file 1 [file esurf-7-737-2019-supplement.zip › esurf-7-737-2019-supplement-title-page.pdf]

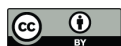

## *Supplement of*

# **Computing water flow through complex landscapes – Part 1: Incorporating depressions in flow routing using FlowFill**

**Kerry L. Callaghan and Andrew D. Wickert**

*Correspondence to:* Kerry L. Callaghan ([calla350@umn.edu](mailto:calla350@umn.edu))

- [esurf-7-737-2019-supplement-title-page.pdf](#)
- [Runoff\\_UnfilledCells\\_Depressions.xlsx](#)

The copyright of individual parts of the supplement might differ from the CC BY 4.0 License.
